# Supplementary material for: Metal-organic framework glasses with permanent accessible porosity
Source: PubMed Central journal article supplement (PMC6262007; doi:10.1038/s41467-018-07532-z), 2018-11-28
Supplement: 41467_2018_7532_MOESM2_ESM.pdf [file 41467_2018_7532_MOESM2_ESM.pdf]

Description of Additional Supplementary Files

**Supplementary Data 1:** CIF File of ZIF-76 used for gas sorption simulations
